# Supplementary material for: Targeting HER2 in patient‐derived xenograft ovarian cancer models sensitizes tumors to chemotherapy
Source: PubMed Central journal article supplement (PMC6360362; doi:10.1002/1878-0261.12414), 2018-12-21

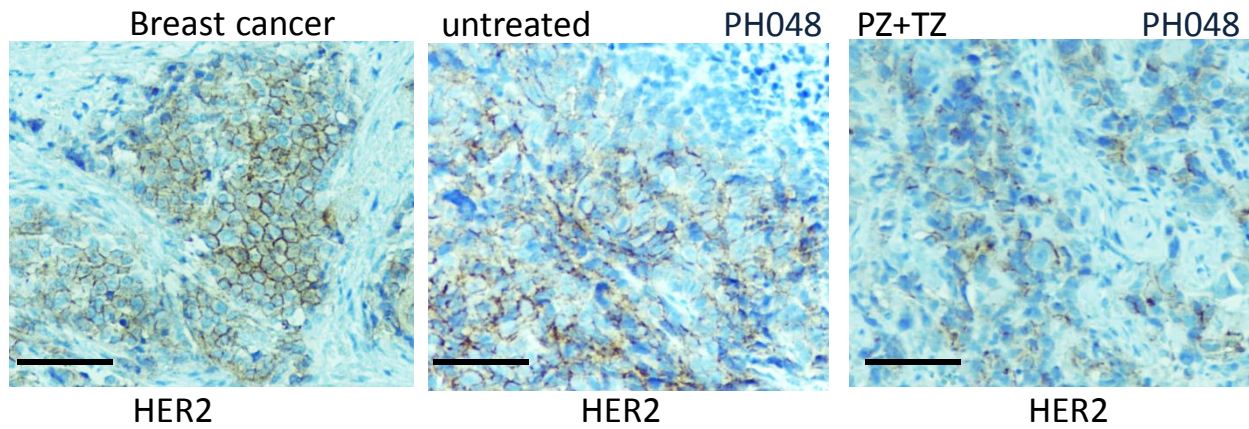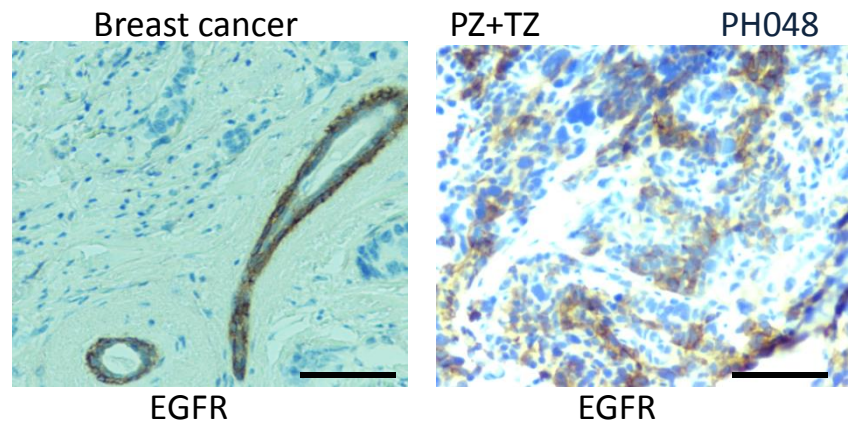

Supplement: MOL2-13-132-s003.pdf [file MOL2-13-132-s003.pdf]
